# Supplementary material for: Small “Nested” Introgressions from Wild Thinopyrum Species, Conferring Effective Resistance to Fusarium Diseases, Positively Impact Durum Wheat Yield Potential
Source: MDPI journal article supplement (doi:10.3390/plants10030579), 2021-03-19
Supplement: s1 [file s1]

## Supplementary material

### Small “nested” introgressions from wild *Thinopyrum* species conferring effective resistance to *Fusarium* diseases positively impact durum wheat yield potential

Kuzmanović L\*, Giovenali G, Ruggeri R, Rossini F, Ceoloni C.

**Table S1.** Means  $\pm$  standard errors of yield and yield-related traits recorded in 2019 and 2020 seasons for 7e1<sub>1</sub>L+7e1<sub>2</sub>L recombinants (R193+, R216+) and their null segregates (R193-, R216-) under rainfed growing conditions.

| RL          | GY (g)         | TILN           | GN               | TGW (g)        | GYS (g)         | SPN            | GNS            | GNSP           |
|-------------|----------------|----------------|------------------|----------------|-----------------|----------------|----------------|----------------|
| <b>2019</b> |                |                |                  |                |                 |                |                |                |
| R193+       | 17.5 $\pm$ 1.4 | 11.3 $\pm$ 0.9 | 354.7 $\pm$ 20.7 | 49.1 $\pm$ 1.9 | 3.01 $\pm$ 0.10 | 18.2 $\pm$ 0.3 | 53.0 $\pm$ 1.8 | 2.9 $\pm$ 0.1  |
| R193-       | 18.1 $\pm$ 1.8 | 12.0 $\pm$ 1.9 | 416.9 $\pm$ 45.9 | 44.3 $\pm$ 2.4 | 3.05 $\pm$ 0.15 | 18.5 $\pm$ 0.4 | 57.7 $\pm$ 2.7 | 3.1 $\pm$ 0.1  |
| R216+       | 11.8 $\pm$ 0.9 | 10.3 $\pm$ 0.9 | 268.8 $\pm$ 18.1 | 43.9 $\pm$ 2.2 | 2.20 $\pm$ 0.08 | 17.2 $\pm$ 0.3 | 41.7 $\pm$ 1.1 | 2.4 $\pm$ 0.04 |
| R216-       | 13.6 $\pm$ 1.9 | 12.3 $\pm$ 1.1 | 315.9 $\pm$ 36.6 | 42.7 $\pm$ 1.7 | 2.69 $\pm$ 0.10 | 18.3 $\pm$ 0.3 | 52.4 $\pm$ 1.5 | 2.9 $\pm$ 0.1  |
| <b>2020</b> |                |                |                  |                |                 |                |                |                |
| R193+       | 10.3 $\pm$ 1.6 | 4.0 $\pm$ 0.5  | 203.1 $\pm$ 29.1 | 51.1 $\pm$ 2.7 | 2.46 $\pm$ 0.12 | 17.1 $\pm$ 0.3 | 46.3 $\pm$ 1.7 | 2.7 $\pm$ 0.1  |
| R193-       | 10.9 $\pm$ 1.1 | 4.3 $\pm$ 0.4  | 208.6 $\pm$ 17.4 | 52.6 $\pm$ 3.0 | 2.89 $\pm$ 0.13 | 18.8 $\pm$ 0.3 | 53.8 $\pm$ 1.5 | 2.9 $\pm$ 0.1  |
| R216+       | 10.8 $\pm$ 1.5 | 5.5 $\pm$ 0.7  | 208.1 $\pm$ 31.1 | 53.0 $\pm$ 1.3 | 2.45 $\pm$ 0.08 | 18.5 $\pm$ 0.2 | 45.8 $\pm$ 1.4 | 2.5 $\pm$ 0.1  |
| R216-       | 9.6 $\pm$ 1.2  | 4.3 $\pm$ 0.4  | 164.1 $\pm$ 20.2 | 58.9 $\pm$ 0.9 | 2.39 $\pm$ 0.11 | 16.8 $\pm$ 0.4 | 40.2 $\pm$ 1.7 | 2.4 $\pm$ 0.1  |

GY, grain yield/plant; TILN, tiller number/plant; GN, grain number/plant; TGW, 1000-grain weight; GYS, grain yield/spike; SPN, spikelet No./spike; GNS, grain No./spike; GNSP, grain No./spikelet; RL, recombinant line

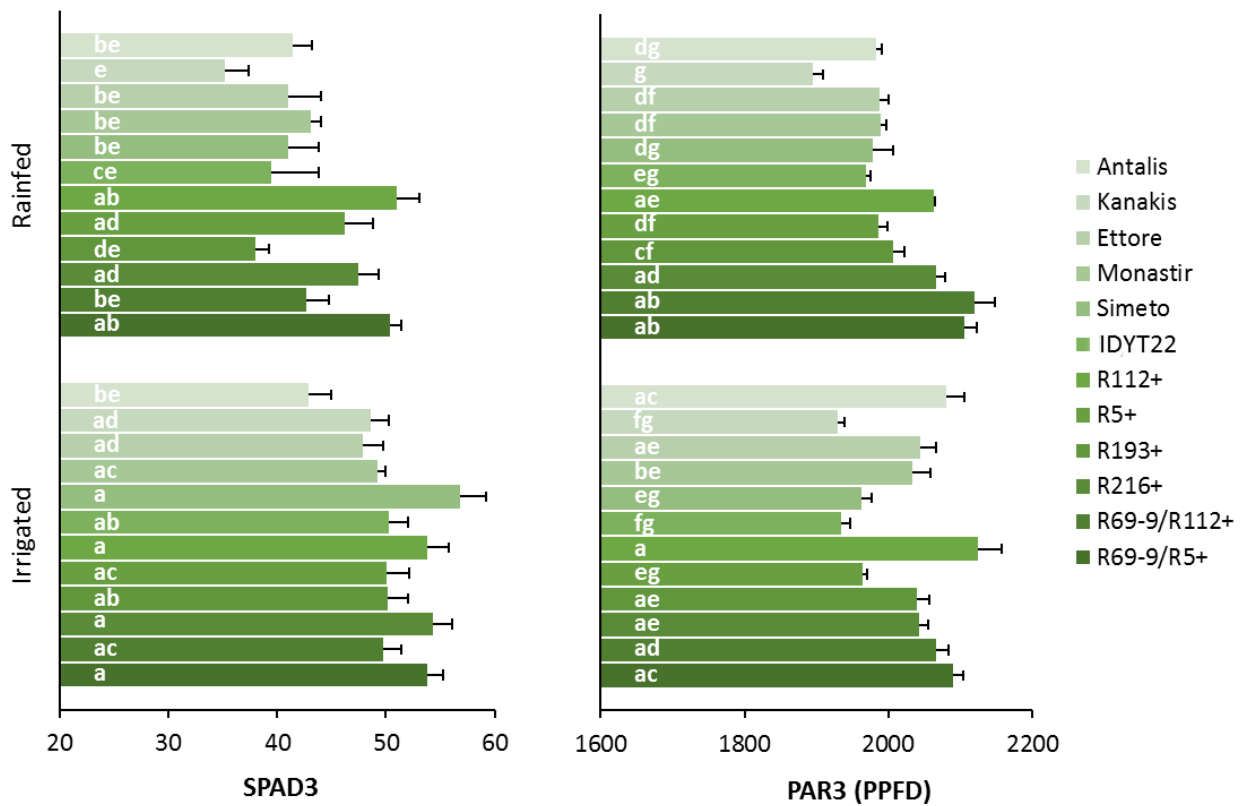

**Figure S1.** Significant Genotype  $\times$  Irrigation effect on flag leaf physiological traits measured in 2020 under rainfed and irrigated conditions (SPAD3, chlorophyll content at 20 days post-anthesis; PAR3, photosynthetically active radiation of PSII at 20 days post-anthesis); bars represent standard errors of means; letters within histograms correspond to ranking of the Tukey test at  $p < 0.05$  level.

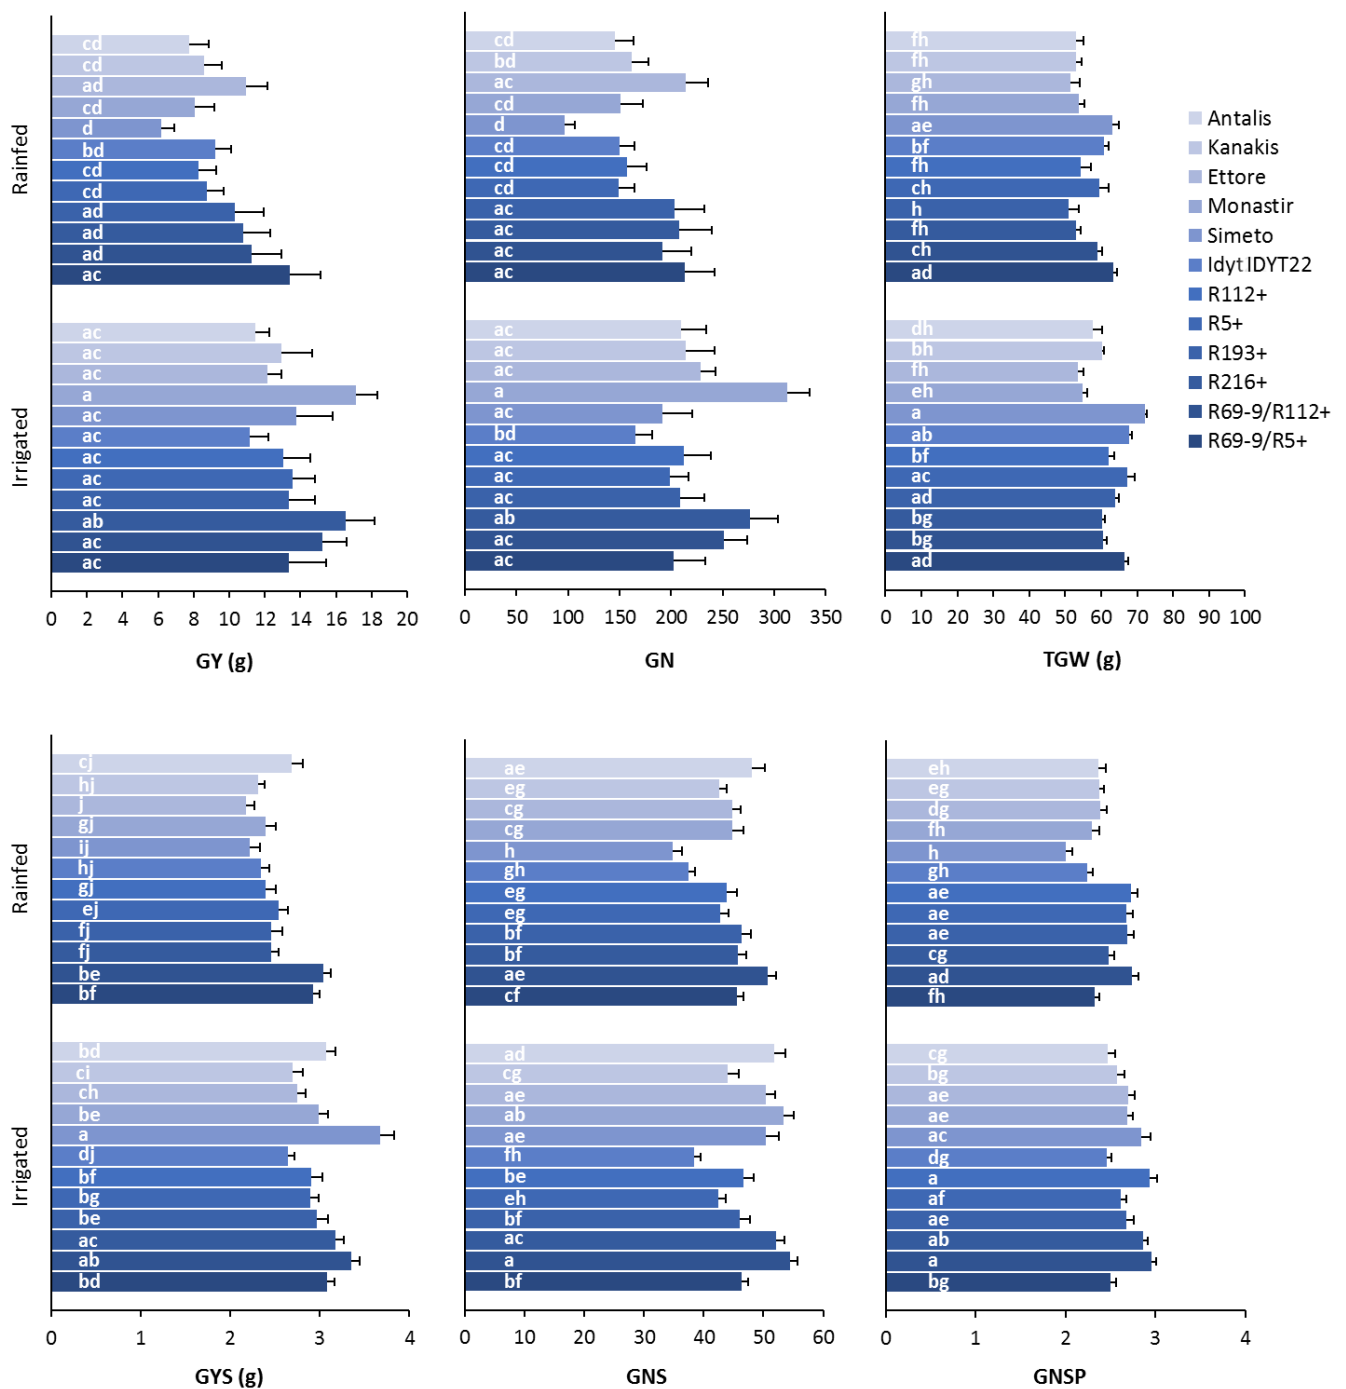

**Figure S2.** Significant Genotype  $\times$  Irrigation effect on yield-related traits measured in 2020 under rainfed and irrigated conditions (GY, grain yield/plant; GN, grain number/plant; TGW, 1000-grain weight; GYS, grain yield/spike; GNS, grain No./spike; GNSP, grain No./spikelet; bars represent standard errors of means; letters within histograms correspond to ranking of the Tukey test at  $p < 0.05$  level.
